# Supplementary material for: The Exposure Peaks of Traffic-Related Ultrafine Particles Associated with Inflammatory Biomarkers and Blood Lipid Profiles
Source: MDPI journal article supplement (doi:10.3390/toxics12020147), 2024-02-13
Supplement: s1 [file s1]

# The Exposure Peaks of Traffic-Related Ultrafine Particles Associated with Inflammatory Biomarkers and Blood Lipid Profiles.

Cheng Lin, Kevin J. Lane, Virginia R. Chomitz, Jeffrey K. Griffiths and Doug Brugge

## Supplemental Materials

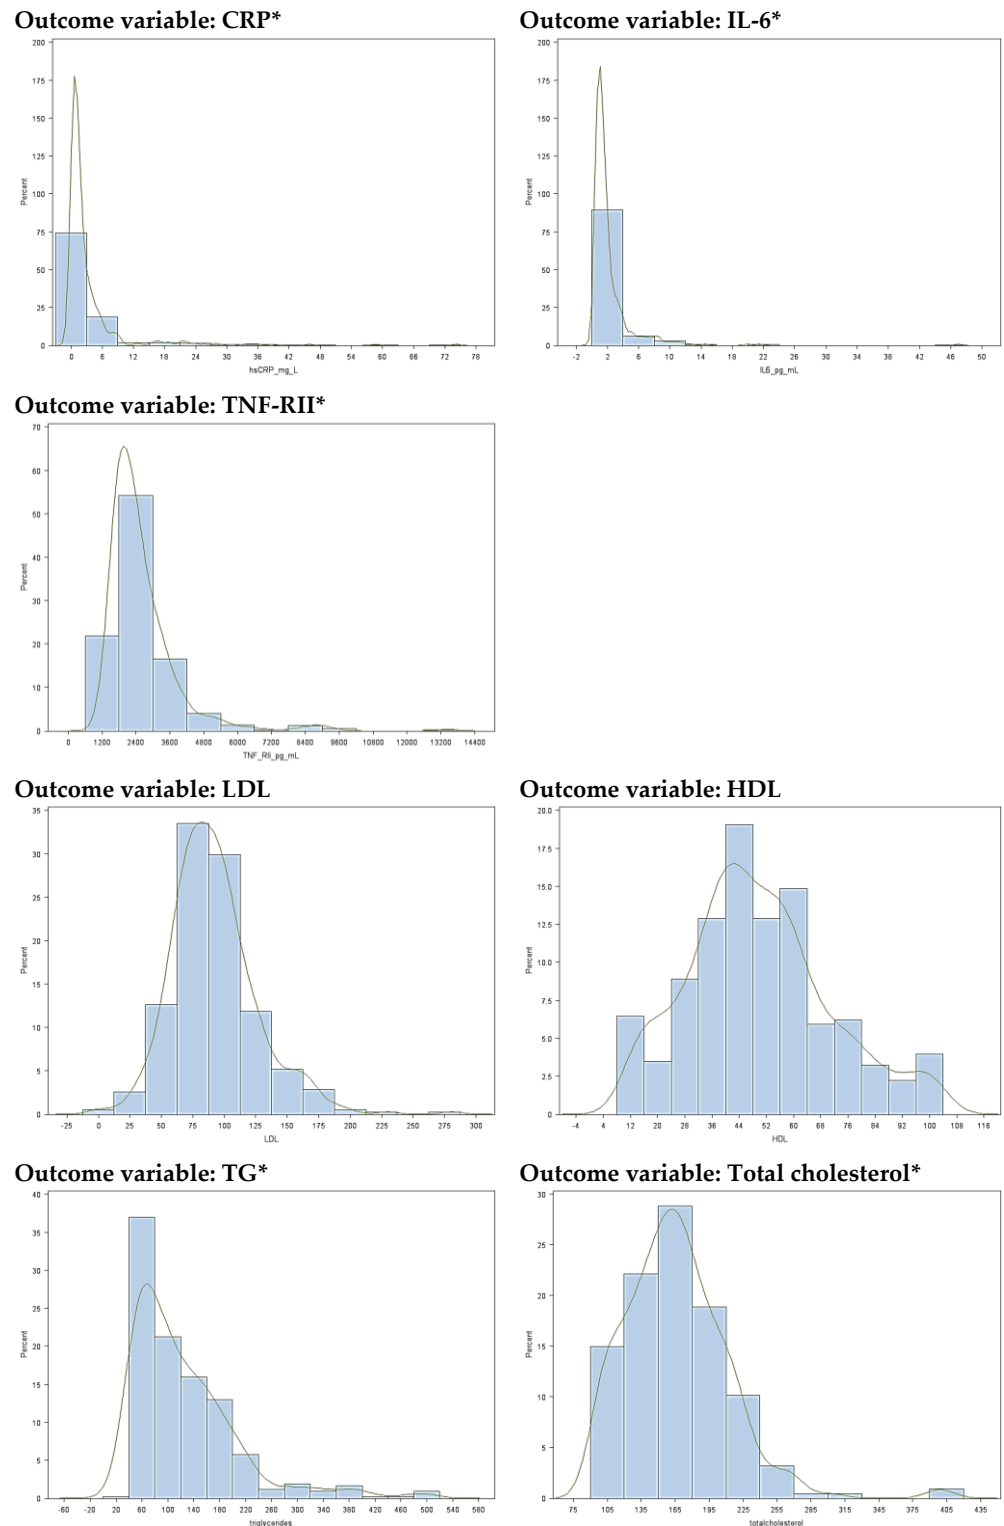

**Figure S1.** Histograms of all outcome variables. Out of the seven variables, five (CRP, IL-6, TNF-RII, TG and total cholesterol, marked by “\*”) were deemed overly skewed from a normal distribution, and were log-transformed before being added to the analysis.

**Table S1.** Descriptive statistics of UFP average and peak exposure metrics, based on each of the four candidate percentiles, by type of neighborhood areas.

|                                                                                             | N <sup>2</sup> | Mean                 | Standard Deviation   | Median               | Minimum              | Lower Quartile       | Upper Quartile       | Maximum              |
|---------------------------------------------------------------------------------------------|----------------|----------------------|----------------------|----------------------|----------------------|----------------------|----------------------|----------------------|
| <b>Near-highway Neighborhoods</b>                                                           |                |                      |                      |                      |                      |                      |                      |                      |
| <b>Annual average of TAA-PNC exposure (Unit: cm<sup>-3</sup>)</b>                           | 513            | 2.33*10 <sup>4</sup> | 0.48*10 <sup>4</sup> | 2.35*10 <sup>4</sup> | 1.08*10 <sup>4</sup> | 2.02*10 <sup>4</sup> | 2.71*10 <sup>4</sup> | 3.47*10 <sup>4</sup> |
| <b>Intensity of TAA-PNC exposure peaks (Unit: cm<sup>-3</sup>)</b>                          |                |                      |                      |                      |                      |                      |                      |                      |
| Cut-off percentile: P90                                                                     | 513            | 3.86*10 <sup>4</sup> | 0.82*10 <sup>4</sup> | 4.05*10 <sup>4</sup> | 1.73*10 <sup>4</sup> | 3.48*10 <sup>4</sup> | 4.42*10 <sup>4</sup> | 5.50*10 <sup>4</sup> |
| Cut-off percentile: P95                                                                     | 513            | 4.58*10 <sup>4</sup> | 0.96*10 <sup>4</sup> | 4.83*10 <sup>4</sup> | 1.97*10 <sup>4</sup> | 4.14*10 <sup>4</sup> | 5.21*10 <sup>4</sup> | 6.39*10 <sup>4</sup> |
| Cut-off percentile: P98                                                                     | 513            | 5.49*10 <sup>4</sup> | 1.11*10 <sup>4</sup> | 5.77*10 <sup>4</sup> | 2.21*10 <sup>4</sup> | 4.87*10 <sup>4</sup> | 6.25*10 <sup>4</sup> | 7.27*10 <sup>4</sup> |
| Cut-off percentile: P99                                                                     | 513            | 6.09*10 <sup>4</sup> | 1.19*10 <sup>4</sup> | 6.39*10 <sup>4</sup> | 2.53*10 <sup>4</sup> | 5.48*10 <sup>4</sup> | 6.98*10 <sup>4</sup> | 8.19*10 <sup>4</sup> |
| <b>Frequency of TAA-PNC exposure peaks (Unit: hours)</b>                                    |                |                      |                      |                      |                      |                      |                      |                      |
| Ref. level cut-off pctl. <sup>1</sup> : P90                                                 | 513            | 1138.24              | 557.05               | 1074                 | 34                   | 808                  | 1462                 | 3393                 |
| Ref. level cut-off pctl. <sup>1</sup> : P95                                                 | 513            | 577.39               | 337.73               | 526                  | 1                    | 392                  | 735                  | 2196                 |
| Ref. level cut-off pctl. <sup>1</sup> : P98                                                 | 513            | 234.03               | 178.07               | 199                  | 0                    | 123                  | 293                  | 1117                 |
| Ref. level cut-off pctl. <sup>1</sup> : P99                                                 | 513            | 117.31               | 109.66               | 90                   | 0                    | 38                   | 154                  | 655                  |
| <b>Frequency of TAA-PNC exposure peaks, excluding zero values<sup>3</sup> (Unit: hours)</b> |                |                      |                      |                      |                      |                      |                      |                      |
| Ref. level cut-off pctl. <sup>1</sup> : P90                                                 | 513            | 1138.24              | 557.05               | 1074                 | 34                   | 808                  | 1462                 | 3393                 |
| Ref. level cut-off pctl. <sup>1</sup> : P95                                                 | 513            | 577.39               | 337.73               | 526                  | 1                    | 392                  | 735                  | 2196                 |
| Ref. level cut-off pctl. <sup>1</sup> : P98                                                 | 509            | 235.86               | 177.55               | 201                  | 1                    | 123                  | 294                  | 1117                 |
| Ref. level cut-off pctl. <sup>1</sup> : P99                                                 | 500            | 120.36               | 109.41               | 93.5                 | 1                    | 42.5                 | 157.5                | 655                  |
| <b>Urban Background Neighborhoods</b>                                                       |                |                      |                      |                      |                      |                      |                      |                      |
| <b>Annual average of TAA-PNC exposure (Unit: cm<sup>-3</sup>)</b>                           | 188            | 1.30*10 <sup>4</sup> | 0.31*10 <sup>4</sup> | 1.20*10 <sup>4</sup> | 0.88*10 <sup>4</sup> | 1.03*10 <sup>4</sup> | 1.57*10 <sup>4</sup> | 2.37*10 <sup>4</sup> |
| <b>Intensity of TAA-PNC exposure peaks (Unit: cm<sup>-3</sup>)</b>                          |                |                      |                      |                      |                      |                      |                      |                      |
| Cut-off percentile: P90                                                                     | 188            | 2.27*10 <sup>4</sup> | 0.36*10 <sup>4</sup> | 2.17*10 <sup>4</sup> | 1.68*10 <sup>4</sup> | 2.03*10 <sup>4</sup> | 2.50*10 <sup>4</sup> | 4.81*10 <sup>4</sup> |
| Cut-off percentile: P95                                                                     | 188            | 2.70*10 <sup>4</sup> | 0.48*10 <sup>4</sup> | 2.69*10 <sup>4</sup> | 1.83*10 <sup>4</sup> | 2.41*10 <sup>4</sup> | 3.02*10 <sup>4</sup> | 5.91*10 <sup>4</sup> |
| Cut-off percentile: P98                                                                     | 188            | 3.34*10 <sup>4</sup> | 0.71*10 <sup>4</sup> | 3.44*10 <sup>4</sup> | 2.07*10 <sup>4</sup> | 2.85*10 <sup>4</sup> | 3.73*10 <sup>4</sup> | 7.61*10 <sup>4</sup> |
| Cut-off percentile: P99                                                                     | 188            | 3.82*10 <sup>4</sup> | 0.87*10 <sup>4</sup> | 3.96*10 <sup>4</sup> | 2.19*10 <sup>4</sup> | 3.16*10 <sup>4</sup> | 4.34*10 <sup>4</sup> | 9.12*10 <sup>4</sup> |
| <b>Frequency of TAA-PNC exposure peaks (Unit: hours)</b>                                    |                |                      |                      |                      |                      |                      |                      |                      |
| Ref. level cut-off pctl. <sup>1</sup> : P90                                                 | 188            | 130.12               | 137.75               | 94                   | 7                    | 56.5                 | 153.5                | 1391                 |
| Ref. level cut-off pctl. <sup>1</sup> : P95                                                 | 188            | 42.59                | 77.64                | 27                   | 0                    | 12                   | 58                   | 958                  |
| Ref. level cut-off pctl. <sup>1</sup> : P98                                                 | 188            | 8.63                 | 36.25                | 2                    | 0                    | 1                    | 6.5                  | 471                  |
| Ref. level cut-off pctl. <sup>1</sup> : P99                                                 | 188            | 3.52                 | 21.26                | 0                    | 0                    | 0                    | 1                    | 277                  |
| <b>Frequency of TAA-PNC exposure peaks, excluding zero values<sup>3</sup> (Unit: hours)</b> |                |                      |                      |                      |                      |                      |                      |                      |
| Ref. level cut-off pctl. <sup>1</sup> : P90                                                 | 188            | 130.12               | 137.75               | 94                   | 7                    | 56.5                 | 153.5                | 1391                 |
| Ref. level cut-off pctl. <sup>1</sup> : P95                                                 | 180            | 44.48                | 78.82                | 28                   | 1                    | 15                   | 60.5                 | 958                  |
| Ref. level cut-off pctl. <sup>1</sup> : P98                                                 | 145            | 11.19                | 40.95                | 3                    | 1                    | 2                    | 10                   | 471                  |
| Ref. level cut-off pctl. <sup>1</sup> : P99                                                 | 85             | 7.79                 | 31.18                | 1                    | 1                    | 1                    | 5                    | 277                  |
| <b>All study areas</b>                                                                      |                |                      |                      |                      |                      |                      |                      |                      |
| <b>Annual average of TAA-PNC exposure (Unit: cm<sup>-3</sup>)</b>                           | 701            | 2.06*10 <sup>4</sup> | 0.64*10 <sup>4</sup> | 2.14*10 <sup>4</sup> | 0.88*10 <sup>4</sup> | 1.54*10 <sup>4</sup> | 2.56*10 <sup>4</sup> | 3.47*10 <sup>4</sup> |
| <b>Intensity of TAA-PNC exposure peaks (Unit: cm<sup>-3</sup>)</b>                          |                |                      |                      |                      |                      |                      |                      |                      |
| Cut-off percentile: P90                                                                     | 701            | 3.44*10 <sup>4</sup> | 1.01*10 <sup>4</sup> | 3.69*10 <sup>4</sup> | 1.68*10 <sup>4</sup> | 2.45*10 <sup>4</sup> | 4.32*10 <sup>4</sup> | 5.50*10 <sup>4</sup> |
| Cut-off percentile: P95                                                                     | 701            | 4.07*10 <sup>4</sup> | 1.19*10 <sup>4</sup> | 4.37*10 <sup>4</sup> | 1.83*10 <sup>4</sup> | 2.94*10 <sup>4</sup> | 5.04*10 <sup>4</sup> | 6.39*10 <sup>4</sup> |
| Cut-off percentile: P98                                                                     | 701            | 4.91*10 <sup>4</sup> | 1.39*10 <sup>4</sup> | 5.27*10 <sup>4</sup> | 2.07*10 <sup>4</sup> | 3.66*10 <sup>4</sup> | 6.07*10 <sup>4</sup> | 7.61*10 <sup>4</sup> |
| Cut-off percentile: P99                                                                     | 701            | 5.48*10 <sup>4</sup> | 1.50*10 <sup>4</sup> | 5.90*10 <sup>4</sup> | 2.19*10 <sup>4</sup> | 4.21*10 <sup>4</sup> | 6.75*10 <sup>4</sup> | 9.12*10 <sup>4</sup> |
| <b>Frequency of TAA-PNC exposure peaks (Unit: hours)</b>                                    |                |                      |                      |                      |                      |                      |                      |                      |
| Ref. level cut-off pctl. <sup>1</sup> : P90                                                 | 701            | 867.88               | 657.10               | 889                  | 7                    | 178                  | 1291                 | 3393                 |
| Ref. level cut-off pctl. <sup>1</sup> : P95                                                 | 701            | 433.96               | 375.84               | 427                  | 0                    | 67                   | 645                  | 2196                 |

|                                                                                              |     |        |        |     |   |     |      |      |
|----------------------------------------------------------------------------------------------|-----|--------|--------|-----|---|-----|------|------|
| Ref. level cut-off pctl. <sup>1</sup> : P98                                                  | 701 | 173.58 | 183.11 | 143 | 0 | 11  | 249  | 1117 |
| Ref. level cut-off pctl. <sup>1</sup> : P99                                                  | 701 | 86.79  | 107.06 | 56  | 0 | 2   | 123  | 655  |
| <b>Frequency of TAA-PNC exposure peaks, excluding zero values <sup>3</sup> (Unit: hours)</b> |     |        |        |     |   |     |      |      |
| Ref. level cut-off pctl. <sup>1</sup> : P90                                                  | 701 | 867.88 | 657.10 | 889 | 7 | 178 | 1291 | 3393 |
| Ref. level cut-off pctl. <sup>1</sup> : P95                                                  | 693 | 438.97 | 375.08 | 431 | 1 | 71  | 647  | 2196 |
| Ref. level cut-off pctl. <sup>1</sup> : P98                                                  | 654 | 186.05 | 183.35 | 156 | 1 | 24  | 260  | 1117 |
| Ref. level cut-off pctl. <sup>1</sup> : P99                                                  | 585 | 104.00 | 109.29 | 78  | 1 | 18  | 143  | 655  |

<sup>1</sup> The percentile used to determine the overall reference level for the definition of frequency of TAA-PNC exposure peaks.

<sup>2</sup> Number of participants with complete TAA-PNC exposure data, of whom not all were included in the final models.

<sup>3</sup> Including only participants with non-zero values of frequency of TAA-PNC exposure peaks.
